# Supplementary material for: Harnessing plasma-generated reactive species for the synthesis of different phases of molybdenum oxide to study adsorption and photocatalytic activity
Source: Royal Society of Chemistry journal article supplement (doi:10.1039/d4dt01620c), 2024-01-01
Supplement: d4dt01620c1.pdf [file d4dt01620c1.pdf]

## Electronic Supplementary Information (ESI)

### Harnessing Plasma-generated Reactive Species for the Synthesis of Different Phases of Molybdenum Oxide to Study Adsorption and Photocatalytic Activity

Parismita Kalita<sup>a, b</sup>, Palash Jyoti Boruah<sup>a</sup>, A. R. Pal<sup>a, b</sup> and H. Bailung<sup>a, b, c, \*</sup>

<sup>a</sup> Plasma Application Laboratory, Physical Sciences Division, Institute of Advanced Study in Science and Technology (IASST), Paschim Boragaon, Guwahati – 781035, Assam, India

<sup>b</sup> Academy of Scientific and Innovative Research (AcSIR), Ghaziabad, Uttar Pradesh – 201002, India

<sup>c</sup> Department of Physics, Bodoland University, Kokrajhar – 783370, Assam, India

\*E-mail: hbailung@yahoo.com

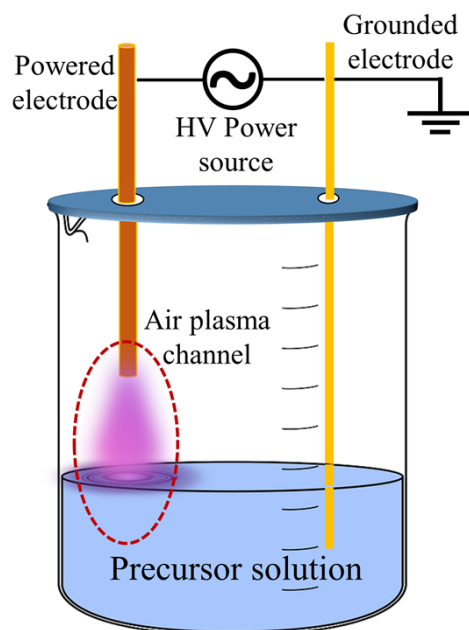

**Fig. S1.** Schematic representation of the plasma liquid reactor which shows the generation of atmospheric pressure air plasma channel above the Mo precursor solution.

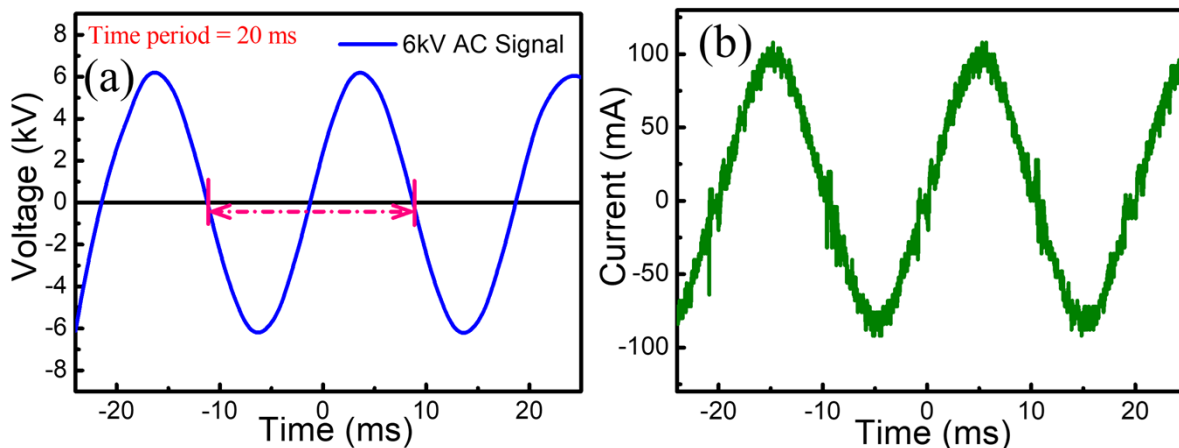

**Fig. S2.** Typical instantaneous (a) applied AC voltage signal waveform and (b) the corresponding discharge current signal.

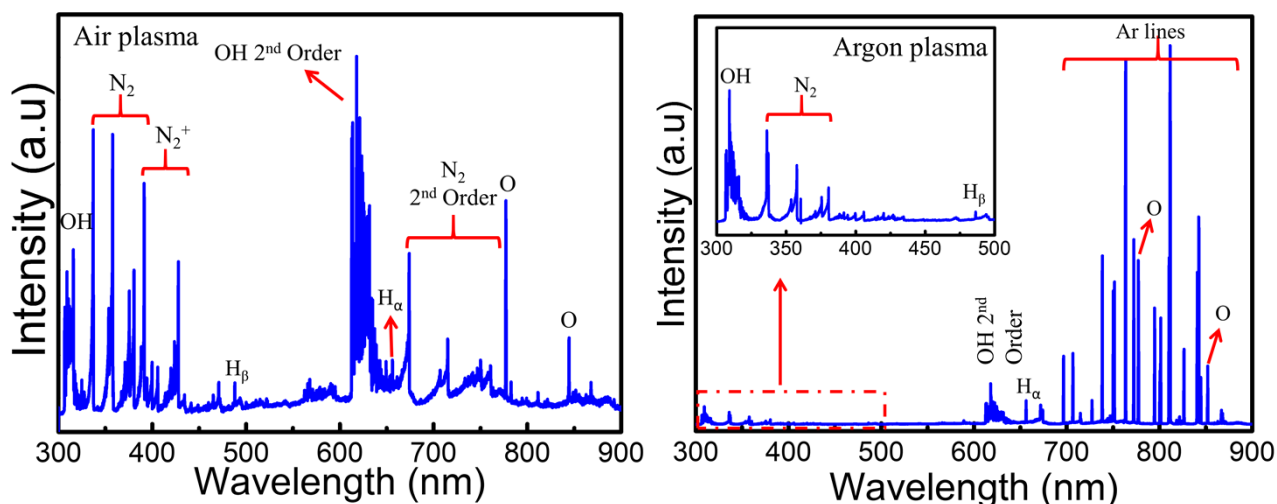

**Fig. S3.** Optical Emission Spectrum of (a) air and (b) argon plasma glow that exhibits various reactive species in the discharge zone.

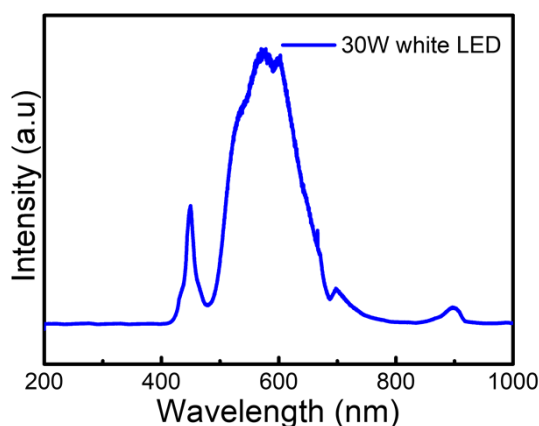

**Fig. S4.** Optical Emission Spectrum (OES) of 30W white LED.

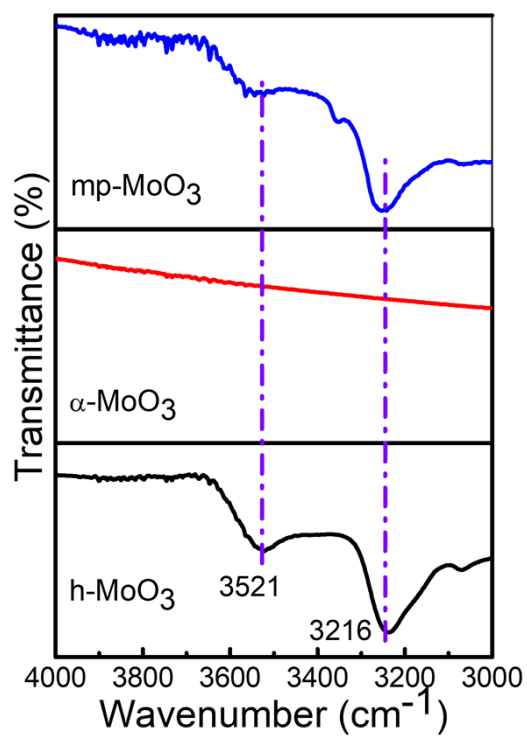

**Fig. S5.** FTIR spectra of three different phases of molybdenum oxide in the spectral range between 4000-3000 cm<sup>-1</sup>.

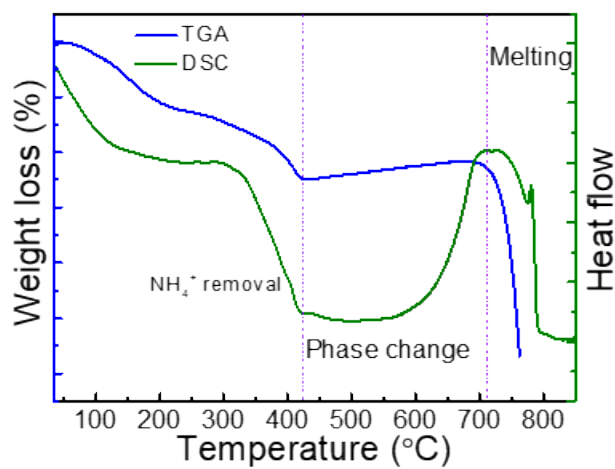

**Fig. S6.** TGA and DSC thermograms for h-MoO<sub>3</sub> sample from room temperature to 850 °C.

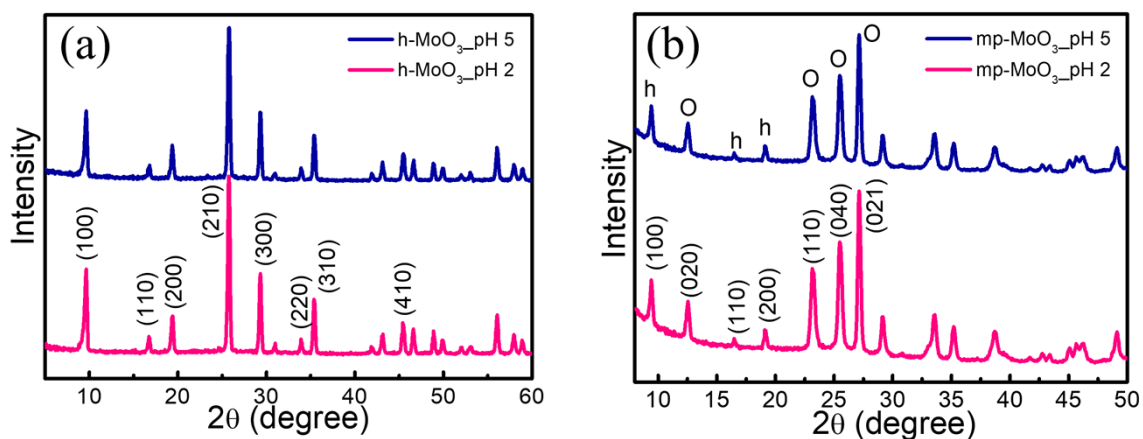

**Fig. S7.** XRD pattern of (a) h-MoO<sub>3</sub> and (b) mp-MoO<sub>3</sub> synthesized at different initial pH of the precursor solution.

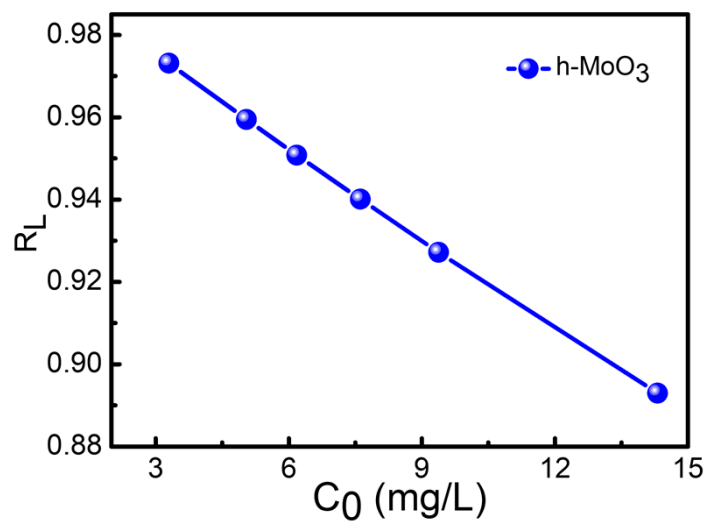

**Fig. S8.** The dimensionless parameter ( $R_L$ ) defined from the Langmuir isotherm model.

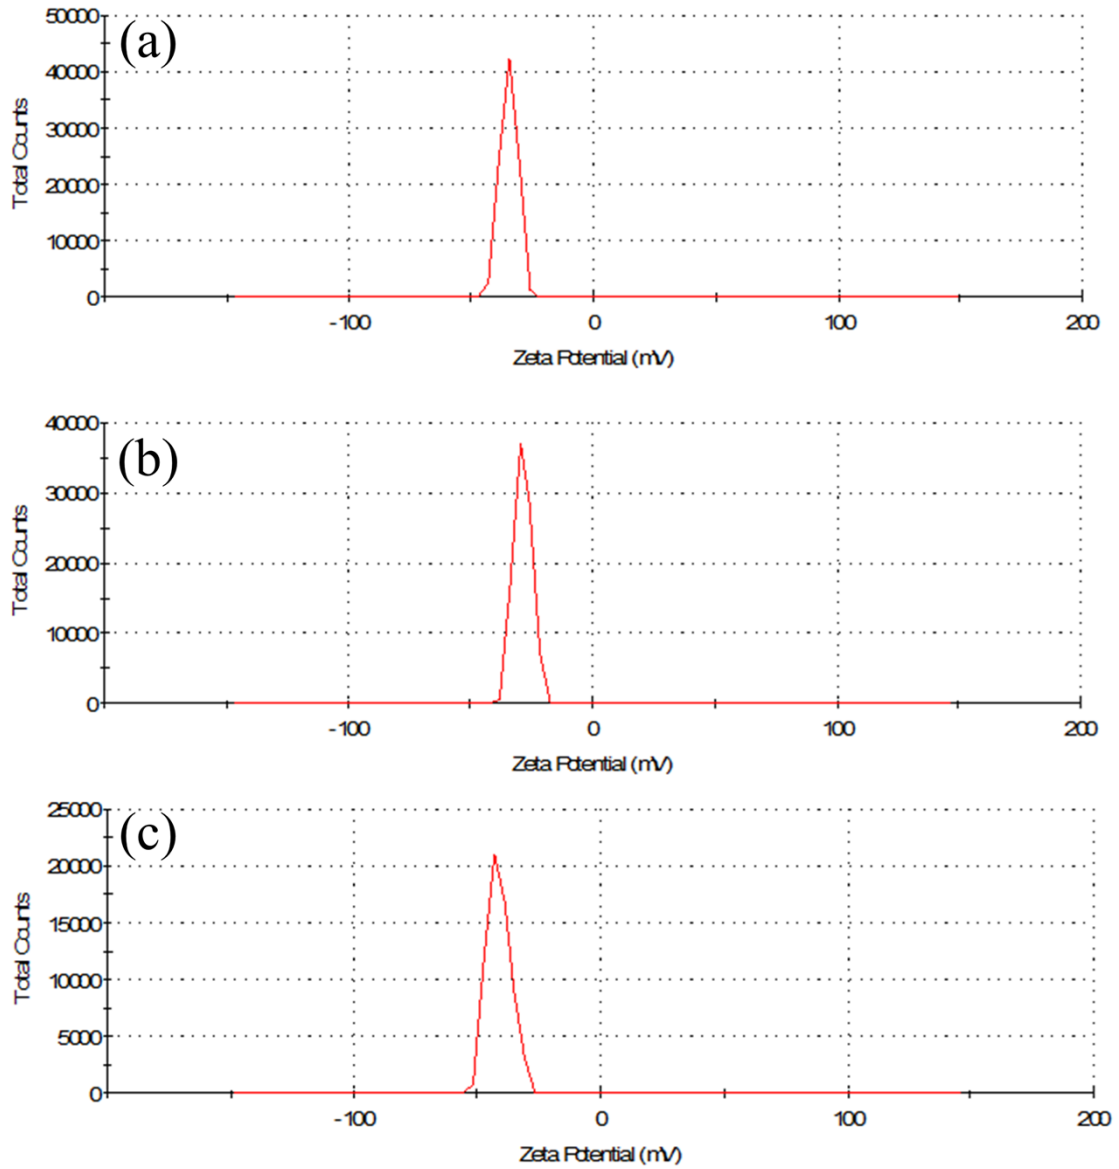

Fig. S9. Zeta potential measurement for the three different phases of molybdenum oxide.

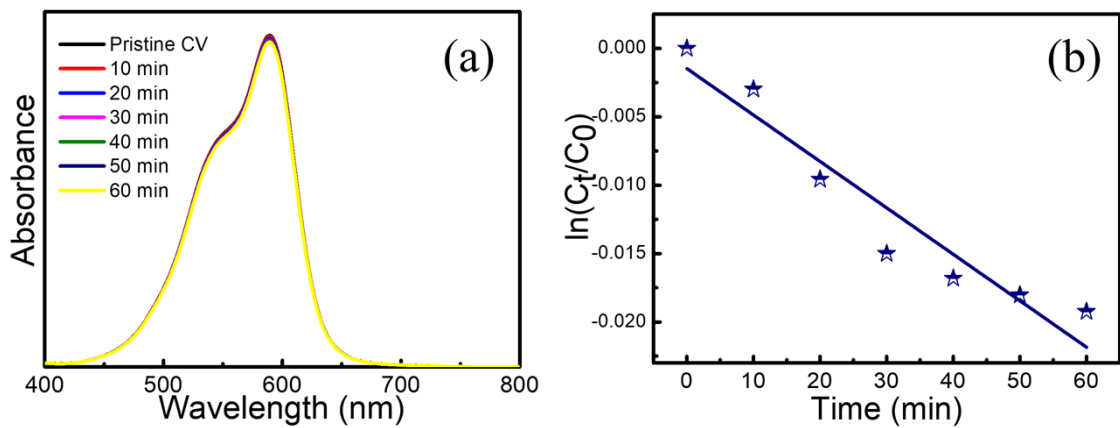

**Fig. S10.** (a) Photo-degradation spectra of CV dye molecules without loading any catalyst as a control experiment for dye degradation and the corresponding (b) pseudo-first-order rate kinetics.

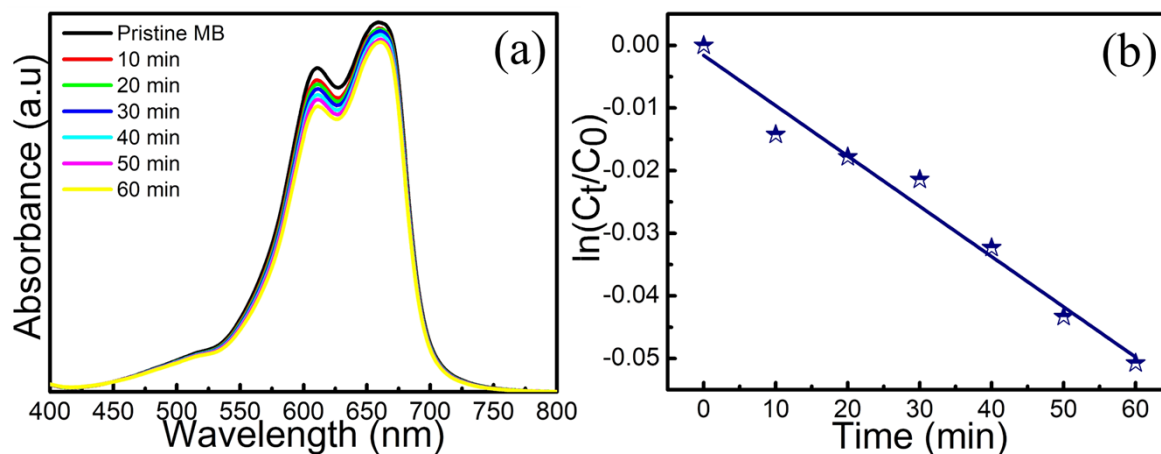

**Fig. S11.** (a) Photo-degradation spectra of MB dye molecules without loading any catalyst as a control experiment for dye degradation and the corresponding (b) pseudo-first-order rate kinetics.

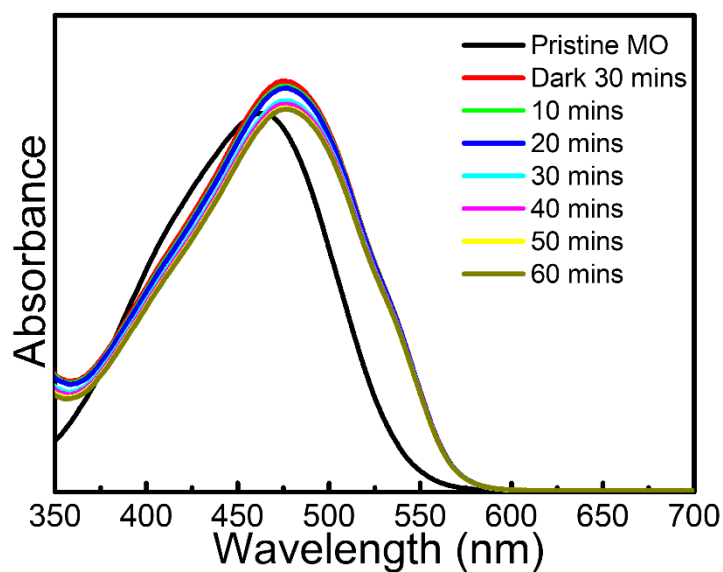

**Fig. S12.** UV-Vis photo-degradation spectra of Methyl orange dye molecules using  $h\text{-MoO}_3$  sample under visible light illumination.

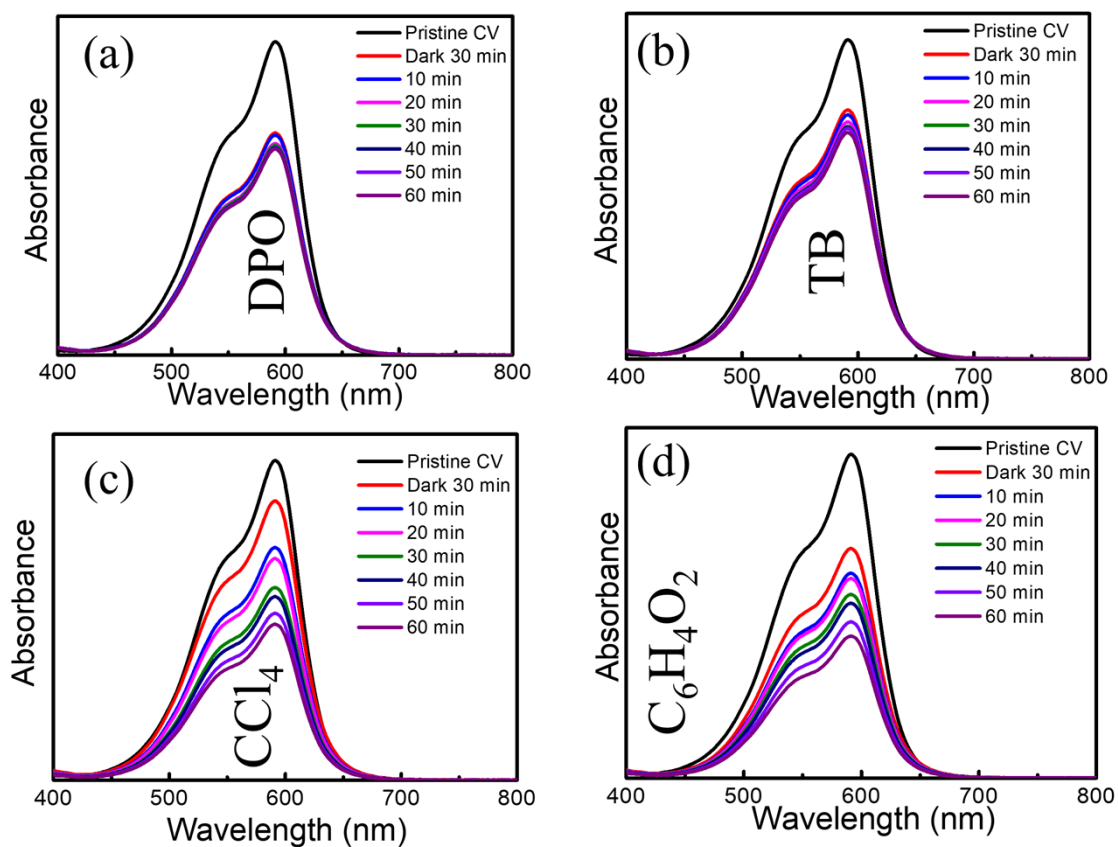

**Fig. S13.** Photo-degradation UV-Vis absorption spectra of CV dye molecules upon 60 mins of visible light irradiation in the presence of (a) di-potassium oxalate ( $\text{K}_2\text{C}_2\text{O}_4 \cdot \text{H}_2\text{O}$ ), (b) *tert*-butanol ( $(\text{CH}_3)_3\text{OH}$ ), (c) carbon tetrachloride ( $\text{CCl}_4$ ), and (d) *p*-benzo-quinone ( $\text{C}_6\text{H}_4\text{O}_2$ ).

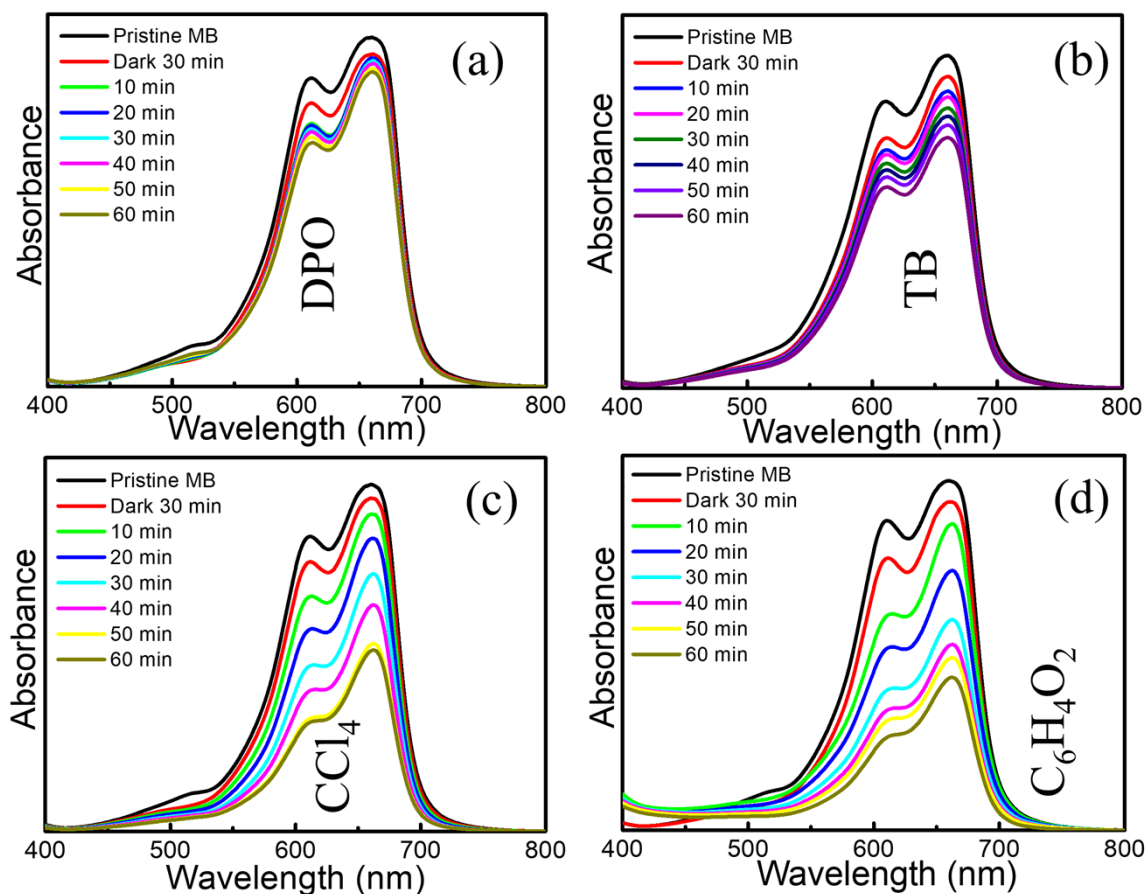

**Fig. S14.** Photo-degradation UV-Vis absorption spectra of MB dye molecules upon 60 mins of visible light irradiation in the presence of (a) di-potassium oxalate ( $K_2C_2O_4 \cdot H_2O$ ), (b) *tert*-butanol ( $(CH_3)_3OH$ ), (c) carbon tetrachloride ( $CCl_4$ ), and (d) *p*-benzo-quinone ( $C_6H_4O_2$ ).

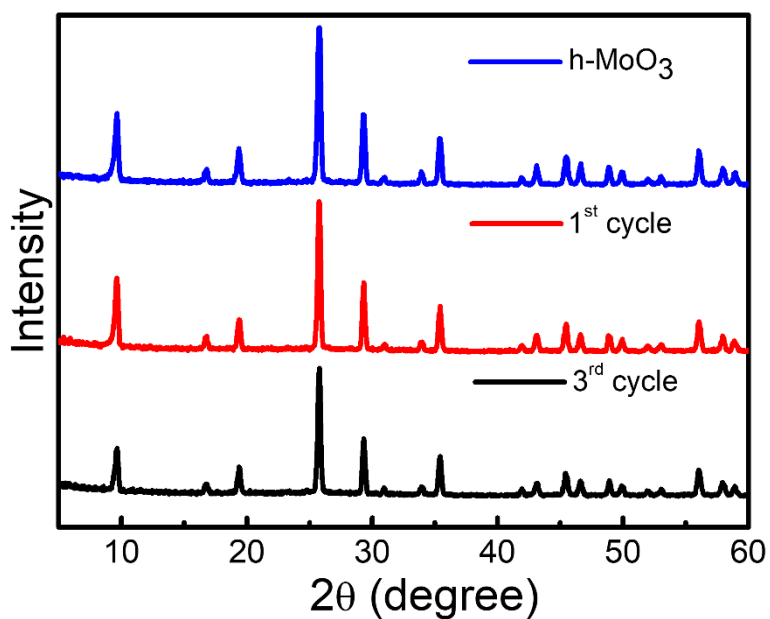

**Fig. S15.** XRD pattern of the photocatalyst before and after reuse during recycling procedure.



**Table S1:** A comparison table of different procedures employed for the synthesis of different phases of molybdenum oxide

| Material         | Synthesis procedure                                    | Source of nanomaterial               | Phase/Shape                                                                                                                                     | Application                   | Reference |
|------------------|--------------------------------------------------------|--------------------------------------|-------------------------------------------------------------------------------------------------------------------------------------------------|-------------------------------|-----------|
| MoO <sub>x</sub> | Solution plasma                                        | Mo electrode                         | Mixed phase of MoO <sub>3</sub> , MoO <sub>2</sub> , and Mo <sub>4</sub> O <sub>11</sub><br>Elongated plate-like                                | Adsorption and Photocatalysis | [1]       |
| MoO <sub>x</sub> | Atmospheric pressure glow discharge                    | Mo electrode                         | Mixed phase of MoO <sub>3</sub> , MoO <sub>2</sub> , and Mo <sub>4</sub> O <sub>11</sub><br>Nanocylinders and prisms                            | Photocatalysis                | [2]       |
| MoO <sub>x</sub> | Atomic layer deposition                                | Mo(CO) <sub>6</sub>                  | Mixed phase of                                                                                                                                  | -                             | [3]       |
| MoO <sub>x</sub> | Spark-plasma                                           | MoO <sub>3</sub> + Mo powder mixture | Mixed phase of α-MoO <sub>3</sub> , MoO <sub>2</sub> , γ-MoO <sub>3</sub> , Mo <sub>17</sub> O <sub>47</sub> , Mo <sub>18</sub> O <sub>52</sub> | -                             | [4]       |
| MoO <sub>x</sub> | Plasma-enhanced hot filament chemical vapor deposition | MoO <sub>3</sub> powder              | Mixed phase of MoO <sub>2</sub> and Mo <sub>4</sub> O <sub>11</sub>                                                                             | -                             | [5]       |

|                     |                        |                         |                                                                            |                               |           |
|---------------------|------------------------|-------------------------|----------------------------------------------------------------------------|-------------------------------|-----------|
| h-MoO <sub>3</sub>  | Air plasma             | Ammonium heptamolybdate | Single-phase and hexagonal microrods                                       | Adsorption and Photocatalysis | This work |
| α-MoO <sub>3</sub>  | Air plasma+Calcination | tetrahydrate            | Single-phase and microsheet-like structure                                 |                               |           |
| mp-MoO <sub>3</sub> | Argon plasma           |                         | Mixed phase of both hexagonal and orthorhombic phase and irregular cluster |                               |           |

**Table S2:** Formation of molybdenum oxides at different pH of the initial precursor solution and the corresponding phase of the material

| Precursor solution | Plasma       | pH of the initial solution | pH of the plasma-treated solution | Treatment time | Phase of the material      |
|--------------------|--------------|----------------------------|-----------------------------------|----------------|----------------------------|
| AHM                | Air plasma   | 2.0                        | 1.24                              | 45 mins        | Hexagonal                  |
| AHM                | Air plasma   | 5.0                        | 2.1                               | 120 mins       | Hexagonal                  |
| AHM                | Air plasma   | 7.0                        | 5.43                              | 120 mins       | No precipitation           |
| AHM                | Air plasma   | 10.0                       | 9.14                              | 120 mins       | No precipitation           |
| AHM                | Argon plasma | 2.0                        | 1.74                              | 120 mins       | Hexagonal and Orthorhombic |

|     |              |      |      |          |                            |
|-----|--------------|------|------|----------|----------------------------|
| AHM | Argon plasma | 5.0  | 3.95 | 120 mins | Hexagonal and Orthorhombic |
| AHM | Argon plasma | 7.0  | 6.55 | 120 mins | No precipitation           |
| AHM | Argon plasma | 10.0 | 9.42 | 120 mins | No precipitation           |

**Table S3:** Fitted adsorption kinetic parameters of the pseudo-first-order kinetic model, pseudo-second-order kinetic model, and inter-particle diffusion model

| Sample              | $Q_{e(exp)}$<br>(mg/gm) | Pseudo-first-order    |                            |                | Pseudo-second-order   |                                      |                | Inter-particle diffusion model |                                       |                |
|---------------------|-------------------------|-----------------------|----------------------------|----------------|-----------------------|--------------------------------------|----------------|--------------------------------|---------------------------------------|----------------|
|                     |                         | $Q_{e(cal)}$<br>mg/gm | $k_1$<br>min <sup>-1</sup> | R <sup>2</sup> | $Q_{e(cal)}$<br>mg/gm | $k_2$<br>gm/mg/<br>min <sup>-1</sup> | R <sup>2</sup> | $C_i$<br>mg/gm                 | $k_i$<br>gm/mg/<br>min <sup>1/2</sup> | R <sup>2</sup> |
| h-MoO <sub>3</sub>  | 33.25                   | 16.31                 | 0.096                      | 0.82           | 29.50                 | 1.435                                | 0.99           | 23.07                          | 1.822                                 | 0.88           |
| mp-MoO <sub>3</sub> | 62.54                   | 44.23                 | 0.051                      | 0.87           | 50.86                 | 0.443                                | 0.98           | 22.10                          | 4.957                                 | 0.95           |

**Table S4:** Fitted parameters of different isotherm models for the adsorption of CV dye molecules onto h-MoO<sub>3</sub> and mp-MoO<sub>3</sub> as an adsorbate

| Isotherm model       | Parameters     | h-MoO <sub>3</sub>                      | mp-MoO <sub>3</sub>                     |
|----------------------|----------------|-----------------------------------------|-----------------------------------------|
| Langmuir             | $Q_{max}$      | 500.00 mg/gm                            | 757.47mg/gm                             |
|                      | $K_L$          | 8.37 mL/mg                              | 6.68 mL/mg                              |
|                      | R <sup>2</sup> | 0.99650                                 | 0.93943                                 |
| Freundlich           | 1/n            | 1.03                                    | 0.96                                    |
|                      | $K_f$          | 4.21 L/mg                               | 5.19 L/mg                               |
|                      | R <sup>2</sup> | 0.99674                                 | 0.98959                                 |
| Dubinin-Radushkevich | $Q_{max}$      | 49.56 mg/gm                             | 66.21 mg/gm                             |
|                      | $\beta$        | 15.19 mol <sup>2</sup> /kJ <sup>2</sup> | 17.90 mol <sup>2</sup> /kJ <sup>2</sup> |
|                      | E              | 0.18 kJ/mol                             | 0.17 kJ/mol                             |
|                      | R <sup>2</sup> | 0.81343                                 | 0.77111                                 |
| Sips                 | 1/n            | 1.10                                    | 1.02                                    |

|  |       |         |         |
|--|-------|---------|---------|
|  | $K_s$ | 0.00786 | 0.00645 |
|  | $R^2$ | 0.99772 | 0.98794 |

#### References:

- [1] A. Khlyustova, N. Sirotkin, A. Kraev, V. Titov, A. Agafonov, Plasma-liquid synthesis of MoO<sub>x</sub> and WO<sub>3</sub> as potential photocatalysts, *Dalt. Trans.* 49 (2020) 6270–6279. <https://doi.org/10.1039/d0dt00834f>.
- [2] N. Sirotkin, A. Khlyustova, V. Titov, A. Agafonov, Plasma-assisted synthesis and deposition of molybdenum oxide nanoparticles on polyethylene terephthalate for photocatalytic degradation of rhodamine B, *Plasma Process. Polym.* 17 (2020) 1–13. <https://doi.org/10.1002/ppap.202000012>.
- [3] P.C. Juan, K.C. Lin, W.H. Cho, C.C. Kei, W.H. Hung, H.P. Shi, Plasma-enhanced atomic layer deposition of molybdenum oxides using molybdenum hexacarbonyl as the precursor, *Mater. Chem. Phys.* 288 (2022) 126395–126404. <https://doi.org/10.1016/j.matchemphys.2022.126395>.
- [4] F. Kaiser, M. Schmidt, Y. Grin, I. Veremchuk, Molybdenum Oxides MoO<sub>x</sub>: Spark-Plasma Synthesis and Thermoelectric Properties at Elevated Temperature, *Chem. Mater.* 32 (2020) 2025–2035. <https://doi.org/10.1021/acs.chemmater.9b05075>.
- [5] B.B. Wang, X.L. Qu, M.K. Zhu, Y.A. Chen, K. Zheng, X.X. Zhong, U. Cvelbar, K. Ostrikov, Plasma produced photoluminescent molybdenum sub-oxide nanophase materials, *J. Alloys Compd.* 765 (2018) 1167–1173. <https://doi.org/10.1016/j.jallcom.2018.06.279>.
